# Supplementary material for: Establishment and characteristics analysis of a crop-drought vulnerability curve: a case study of European winter wheat
Source: Copernicus journal article supplement (doi:10.5194/nhess-2019-175), 2019-08-12
Supplement: Supplementary file [file nhess-2019-175-AC1-supplement.zip]

This document certifies that the manuscript

**Establishment and characteristics analysis of crop-drought vulnerability curve: a case study of European winter wheat**

prepared by the authors

**Yanshen Wu, Hao Guo, Anyu Zhang, Jing'ai Wang**

was edited for proper English language, grammar, punctuation, spelling, and overall style by one or more of the highly qualified native English speaking editors at AJE.

This certificate was issued on **March 16, 2020** and may be verified on the [AJE website](https://aje.com) using the verification code **A86C-32AC-F0EB-B41A-7FB9**.

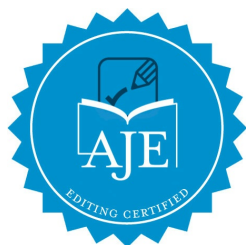

Neither the research content nor the authors' intentions were altered in any way during the editing process. Documents receiving this certification should be English-ready for publication; however, the author has the ability to accept or reject our suggestions and changes. To verify the final AJE edited version, please visit our verification page at [aje.com/certificate](https://aje.com/certificate). If you have any questions or concerns about this edited document, please contact AJE at [support@aje.com](mailto:support@aje.com).
